# Supplementary material
Source: MDPI journal article supplement (https://www.mdpi.com/2071-1050/8/3/290)
Supplement: s1 [file s1]

# Supplementary Materials: A Comparative Study on Sustainability in Architectural Education in Asia – With a Focus on Professional Degree Curricula

Santiago Porras Álvarez, Kyungsun Lee, Jiyoung Park and Sun-Young Rieh

Table S1. Schools and Courses Matrix.

|       | YEAR SEM. | I |   | II                                 |   | III                            |                                             | IV                                  |                                         | V                                                    |                                                  | VI                                    |    |  |
|-------|-----------|---|---|------------------------------------|---|--------------------------------|---------------------------------------------|-------------------------------------|-----------------------------------------|------------------------------------------------------|--------------------------------------------------|---------------------------------------|----|--|
|       |           | 1 | 2 | 3                                  | 4 | 5                              | 6                                           | 7                                   | 8                                       | 9                                                    | 10                                               | 11                                    | 12 |  |
| CHINA | SEU       |   |   |                                    |   | Arch. Physics I<br>2           | Arch. Physics II<br>2                       |                                     | Housing Envr. & Design Principle<br>1   | Urban Envr. Survey<br>2                              | Urban Envr. & Ecology<br>2                       |                                       |    |  |
|       |           |   |   |                                    |   |                                | Arch. Systems<br>3                          |                                     |                                         | Arch. Energy Conservation<br>1                       |                                                  |                                       |    |  |
|       |           |   |   |                                    |   |                                |                                             |                                     |                                         |                                                      |                                                  |                                       |    |  |
|       | TONGJI    |   |   |                                    |   | Building Lighting Physics<br>2 | Design Studio Technology & Environment<br>4 | Social and Historical Analysis<br>3 | Design Studio Interior Environment<br>2 |                                                      |                                                  |                                       |    |  |
|       |           |   |   |                                    |   | Building Thermal Physics<br>2  |                                             |                                     |                                         |                                                      |                                                  |                                       |    |  |
|       |           |   |   |                                    |   | Architectural Acoustics<br>2   |                                             |                                     |                                         |                                                      |                                                  |                                       |    |  |
|       | THU       |   |   |                                    |   | Intro. to Arch. Tech.<br>1     | Arch. Acoustics<br>1                        | Bldg. Thermal Envr.<br>1            | MEP Systems for Bldg.<br>3              | Principles of Sustainable Design <sup>(1)</sup><br>1 | Urban Ecology & Envr. Design <sup>(1)</sup><br>2 | Landscape Ecology <sup>(1)</sup><br>1 |    |  |
|       |           |   |   |                                    |   |                                |                                             | Bldg. Lighting Envr.<br>1           |                                         | Trad. Houses, Vernacular Arch. <sup>(1)</sup><br>1   |                                                  |                                       |    |  |
|       | XJTLU     |   |   | Introduction to Envr. Science<br>5 |   |                                |                                             | Envr. Design & Sustainability<br>5  |                                         | Arch. Tech.<br>5                                     | Design Studio<br>10                              |                                       |    |  |

\* Required Course      Design Studio      Techonology      Theory    \* Optional Course      Design Studio      Techonology      Theory

Table S1. Cont.

|           | YEAR | I |                                       | II                               |   | III |                                       | IV                                    |                                   | V                     |                                                             | VI                                               |                                                   |                                                          |
|-----------|------|---|---------------------------------------|----------------------------------|---|-----|---------------------------------------|---------------------------------------|-----------------------------------|-----------------------|-------------------------------------------------------------|--------------------------------------------------|---------------------------------------------------|----------------------------------------------------------|
|           | SEM. | 1 | 2                                     | 3                                | 4 | 5   | 6                                     | 7                                     | 8                                 | 9                     | 10                                                          | 11                                               | 12                                                |                                                          |
| HONG-KONG | CUHK |   |                                       | Introduction to Bldg. Tech.<br>3 |   |     | Design Studio U4 (Passive Envr.)<br>5 | Bldg. Systems Integration<br>3        |                                   | Design Studio G1<br>6 | Design Studio G2<br>6                                       |                                                  |                                                   |                                                          |
|           |      |   |                                       |                                  |   |     | Bldg. Tech. III (Envr. Tech.)<br>3    | Land & City<br>3                      |                                   | Façade +Tech.<br>3    | Advanced Envr. Systems<br>3                                 |                                                  |                                                   |                                                          |
|           |      |   |                                       |                                  |   |     |                                       |                                       |                                   |                       | China Urban Housing<br>3                                    | Climatic Spatial Planning<br>3                   |                                                   |                                                          |
|           |      |   |                                       |                                  |   |     |                                       |                                       |                                   |                       | Nature In Arch.: History & Design<br>3                      | Performance Based Sim. in Design & Planning<br>3 |                                                   |                                                          |
|           |      |   |                                       |                                  |   |     |                                       |                                       |                                   |                       |                                                             |                                                  |                                                   |                                                          |
|           | HKU  |   | Sustainability & the Built Envr.<br>6 |                                  |   |     |                                       | Bldg. Tech. III (Sustainability)<br>6 | Bldg. Tech. IV (Integration)<br>6 |                       | Sustainable Bldg. Systems <sup>(2)</sup><br>3               | Design & Tech. of Sustainable Bldg.<br>3         | Sustainability Field Workshop <sup>(2)</sup><br>3 | Design Research on Arch. & the Envr. <sup>(2)</sup><br>3 |
|           |      |   |                                       |                                  |   |     |                                       |                                       |                                   |                       | Design research on Arch. Sustainability <sup>(2)</sup><br>3 | Sustainable Design Methods <sup>(2)</sup><br>3   | Arch. by Nature <sup>(2)</sup><br>3               | Vernacular Arch. of Asia <sup>(2)</sup><br>3             |
|           |      |   |                                       |                                  |   |     |                                       |                                       |                                   |                       |                                                             |                                                  |                                                   |                                                          |
|           |      |   |                                       |                                  |   |     |                                       |                                       |                                   |                       |                                                             |                                                  |                                                   |                                                          |
|           |      |   |                                       |                                  |   |     |                                       |                                       |                                   |                       |                                                             |                                                  |                                                   |                                                          |

\* Required Course

 Design Studio

 Techonology

 Theory

\* Optional Course

 Design Studio

 Techonology

 Theory

Table S1. Cont.

| YEAR<br>SEM. | I      |   | II                        |                                | III                            |                                    | IV                       |                        | V |                                            | VI                                       |    |  |
|--------------|--------|---|---------------------------|--------------------------------|--------------------------------|------------------------------------|--------------------------|------------------------|---|--------------------------------------------|------------------------------------------|----|--|
|              | 1      | 2 | 3                         | 4                              | 5                              | 6                                  | 7                        | 8                      | 9 | 10                                         | 11                                       | 12 |  |
| INDIA        | IITKGP |   |                           | Climatology & Solar Arch.<br>3 | Energy Efficient Design<br>3   | Illumination & Elec. Services<br>3 |                          | Bldg. Acoustics<br>3   |   | Traditional Arch.<br>3                     | Disaster Resistant Bldg. & Managmt.<br>3 |    |  |
|              |        |   |                           | Environmental Studies<br>3     | Water Supply & Sanitation<br>3 |                                    |                          |                        |   | Energy & Env. Systems For Green Bldg.<br>3 |                                          |    |  |
|              |        |   | Climatology in Arch.<br>3 |                                |                                |                                    | Bldg. Services<br>2      | Arch. Design IV<br>5   |   | Vashtushastra <sup>(3)</sup><br>3          |                                          |    |  |
|              |        |   |                           |                                |                                |                                    | Bldg. Tech. I<br>4       | Sustainable Arch.<br>4 |   |                                            |                                          |    |  |
|              | IITR   |   |                           |                                |                                |                                    | Acoustic & Lighting<br>3 |                        |   |                                            |                                          |    |  |
|              |        |   |                           |                                |                                |                                    | Vernacular Arch.<br>3    |                        |   |                                            |                                          |    |  |
|              |        |   |                           |                                |                                |                                    |                          |                        |   |                                            |                                          |    |  |
|              |        |   |                           |                                |                                |                                    |                          |                        |   |                                            |                                          |    |  |

\* Required Course

  Design Studio

  Techonology

  Theory

\* Optional Course

  Design Studio

  Techonology

  Theory

Table S1. Cont.

|           | YEAR<br>SEM. | I |   | II                                 |   | III                                |                             | IV |                                               | V                    |                                    | VI |    |
|-----------|--------------|---|---|------------------------------------|---|------------------------------------|-----------------------------|----|-----------------------------------------------|----------------------|------------------------------------|----|----|
|           |              | 1 | 2 | 3                                  | 4 | 5                                  | 6                           | 7  | 8                                             | 9                    | 10                                 | 11 | 12 |
| INDONESIA | ITB          |   |   | Sustainable Built Environment<br>2 |   | Arch. Design Studio III<br>5       | Arch. Design Studio IV<br>5 |    | Preservation of Historic Bldg. and Sites<br>2 | Design Studio I<br>6 | Analysis of Built Envr.<br>2       |    |    |
|           |              |   |   |                                    |   | Bldg. Physics<br>2                 | Bldg. Service<br>2          |    |                                               |                      | Bamboo Bldg. Tech.<br>2            |    |    |
|           |              |   |   |                                    |   | Site Planning & Design Studio<br>3 |                             |    |                                               |                      | Vernacular Arch. of Indonesia<br>2 |    |    |
|           |              |   |   |                                    |   | Appropriate Arch.<br>2             |                             |    |                                               |                      |                                    |    |    |
|           |              |   |   |                                    |   |                                    |                             |    |                                               |                      |                                    |    |    |

\* Required Course

  Design Studio

  Techonology

  Theory

\* Optional Course

  Design Studio

  Techonology

  Theory

Table S1. Cont.

|       | YEAR<br>SEM.          | I                    |                                         | II                                     |                                    | III                                                  |                                                             | IV                                                       |                                                            | V |    | VI |    |                                                    |  |  |  |  |
|-------|-----------------------|----------------------|-----------------------------------------|----------------------------------------|------------------------------------|------------------------------------------------------|-------------------------------------------------------------|----------------------------------------------------------|------------------------------------------------------------|---|----|----|----|----------------------------------------------------|--|--|--|--|
|       |                       | 1                    | 2                                       | 3                                      | 4                                  | 5                                                    | 6                                                           | 7                                                        | 8                                                          | 9 | 10 | 11 | 12 |                                                    |  |  |  |  |
| JAPAN | Kyoto <sup>(4)</sup>  | Envr. & Ecology<br>2 | Intro. to Structural & Envr. Engg.<br>2 | Envr. Engg. I<br>2                     | Envr. Engg. II<br>2                | Bldg. Envr. Systems<br>2                             | Arch. Lighting & Acoustics<br>2                             | Urban Envr. Engg.<br>2                                   | Bldg. Systems Design Theory<br>2                           |   |    |    |    |                                                    |  |  |  |  |
|       |                       |                      |                                         | <i>Theory of Landscape Design</i><br>2 | Housing Planning (Integrated)<br>2 | Design Studio 3 (Integrated Envr. Engg.)<br>3        | <i>Design Studio 4 (Integrated Envr. &amp; Safety)</i><br>3 | <i>Arch. Thermal Envr. Design</i><br>2                   | Envr. Engg. Practice<br>2                                  |   |    |    |    |                                                    |  |  |  |  |
|       | Utokyo <sup>(5)</sup> |                      |                                         |                                        |                                    | Intro. System Design of Bldg. Engg. Systems<br>1.5   | Acoustic Envr. of Bldg.<br>1.5                              | Air & Water Envr. of Bldg.<br>1.5                        | Design Basics III (Envr., History, Urban Integration)<br>2 |   |    |    |    | Design Basics VI (Tech. & Envr., Integration)<br>4 |  |  |  |  |
|       |                       |                      |                                         |                                        |                                    | Principles of Envr. Engg.<br>1.5                     | Lighting & Visual Envr. of Bldg.<br>1.5                     | Envr. Systems Design <sup>(6)</sup><br>2                 | Mechanical Equipment in Bldg. I & II<br>3                  |   |    |    |    |                                                    |  |  |  |  |
|       |                       |                      |                                         |                                        |                                    | Exercises of Arch. & Bdg. Systems (Engg. Envr.)<br>2 |                                                             | Thermal Envr. of Bldg.<br>1.5                            | Intro. to Advanced Envr. Planning & Engg.<br>1.5           |   |    |    |    |                                                    |  |  |  |  |
|       |                       |                      |                                         |                                        |                                    |                                                      |                                                             | Principles of Arch. Design III (Envr. & Behavior)<br>1.5 | History of Japanese Dwelling<br>1.5                        |   |    |    |    |                                                    |  |  |  |  |

\* Required Course

Design Studio

Techonology

Theory

\* Optional Course

Design Studio

Techonology

Theory

Table S1. Cont.

|       | YEAR | I |   | II                                      |                           | III                                               |                                   | IV                                  |                              | V                                          |                            | VI |    |  |
|-------|------|---|---|-----------------------------------------|---------------------------|---------------------------------------------------|-----------------------------------|-------------------------------------|------------------------------|--------------------------------------------|----------------------------|----|----|--|
|       | SEM. | 1 | 2 | 3                                       | 4                         | 5                                                 | 6                                 | 7                                   | 8                            | 9                                          | 10                         | 11 | 12 |  |
| KOREA | SNU  |   |   | Design Studio<br>3 (Arch. & Envr.)<br>3 |                           | Bldg. Mat.<br>3                                   | Arch. Envr. Planning<br>3         | Arch. & Urban Design<br>3           | Arch. Design Studio 4-2<br>6 | Bldg. System<br>3                          |                            |    |    |  |
|       |      |   |   | Arch. Envr. System<br>3                 |                           | Asian Architecture & Urbanism <sup>(7)</sup><br>3 | The City Cultures & Urban<br>3    |                                     | M&E Systems for Bldg.<br>3   |                                            |                            |    |    |  |
|       |      |   |   |                                         |                           |                                                   |                                   |                                     |                              | Arch., City & Planning <sup>(7)</sup><br>3 |                            |    |    |  |
|       | SKKU |   |   |                                         | Design Studio<br>2<br>6   | Design Studio<br>3<br>6                           | Design Studio<br>4<br>6           | Integrated Arch. System Design<br>3 | Sustainable Arch.<br>3       |                                            |                            |    |    |  |
|       |      |   |   |                                         | Envr. Tech. in Arch.<br>3 | Bldg. Mech. & Engg. Service<br>3                  | Arch. Cons. Managmt.<br>3         |                                     |                              |                                            |                            |    |    |  |
|       |      |   |   |                                         |                           | Site Planning<br>3                                | Arch. Mat., Process & Struc.<br>3 | Socio-cultural Context & Arch.<br>3 |                              |                                            |                            |    |    |  |
|       | UOS  |   |   |                                         |                           | Design Studio<br>3<br>6                           | Design Studio<br>4<br>6           | Design Studio<br>5<br>6             | M&E Systems for Bldg.<br>3   |                                            | Arhitecture and Hanok<br>3 |    |    |  |
|       |      |   |   |                                         | Arch. Mat.<br>3           | Bldg. System<br>3                                 | Sustainable Arch.<br>3            | Envr. Tech.<br>3                    |                              |                                            |                            |    |    |  |
|       |      |   |   |                                         |                           | Intro. Cons. Tech.<br>3                           | Site Planning<br>3                |                                     |                              |                                            |                            |    |    |  |
|       |      |   |   |                                         |                           | Theory of Housing and Settlement<br>3             |                                   |                                     |                              |                                            |                            |    |    |  |

\* Required Course

  Design Studio

  Technolology

  Theory

\* Optional Course

  Design Studio

  Technolology

  Theory

Table S1. Cont.

|          | YEAR | I |   | II                   |                                     | III                    |   | IV                                       |                                          | V                         |                         | VI |    |  |
|----------|------|---|---|----------------------|-------------------------------------|------------------------|---|------------------------------------------|------------------------------------------|---------------------------|-------------------------|----|----|--|
|          | SEM. | 1 | 2 | 3                    | 4                                   | 5                      | 6 | 7                                        | 8                                        | 9                         | 10                      | 11 | 12 |  |
| MALAYSIA | USM  |   |   |                      |                                     | Arch. Studio 3<br>7    |   | Arch. Studio 5<br>8                      | Arch. Studio 6<br>8                      | Bldg. Services Tech.<br>3 |                         |    |    |  |
|          |      |   |   | Envr. Science I<br>3 |                                     | Envr. Science 2<br>3   |   | Energy Efficient Bldg. Design Tech.<br>3 |                                          |                           |                         |    |    |  |
|          |      |   |   |                      |                                     |                        |   | Bldg. Services Tech.<br>4                |                                          |                           |                         |    |    |  |
|          | UTM  |   |   |                      | Envr. Science & Sustainability<br>3 | Design 4<br>8          |   | Design 6<br>9                            | Adv. Arch. Tech. & Integrated Envr.<br>3 |                           | Green Bldg. Design<br>3 |    |    |  |
|          |      |   |   |                      |                                     | Heritage Studies.<br>3 |   | Bldg. Integration & Performance<br>3     |                                          |                           |                         |    |    |  |
|          |      |   |   |                      |                                     |                        |   | Energy Conscious Design<br>3             |                                          |                           |                         |    |    |  |

\* Required Course

  Design Studio

  Techonology

  Theory

\* Optional Course

  Design Studio

  Techonology

  Theory

Table S1. Cont.

|             | YEAR<br>SEM. | I |                                      | II                                                               |                                                                                  | III                                                         |                                                           | IV                                                           |                                                              | V                                                     |                                                             | VI |    |
|-------------|--------------|---|--------------------------------------|------------------------------------------------------------------|----------------------------------------------------------------------------------|-------------------------------------------------------------|-----------------------------------------------------------|--------------------------------------------------------------|--------------------------------------------------------------|-------------------------------------------------------|-------------------------------------------------------------|----|----|
|             |              | 1 | 2                                    | 3                                                                | 4                                                                                | 5                                                           | 6                                                         | 7                                                            | 8                                                            | 9                                                     | 10                                                          | 11 | 12 |
| PHILIPPINES | UPD          |   |                                      | <i>History, Theory &amp; Criticism II: Philippine Arch.</i><br>2 | <i>History, Theory &amp; Criticism III: Arch. of Asia &amp; the Pacific</i><br>2 | <b>Arch. Design V: Site Context &amp; Arch. Design</b><br>3 | <b>Arch. Design VI: Arch., Tech. &amp; the Envr.</b><br>3 | <b>Arch. Design VII: Integrative Design Project I</b><br>4   | <b>Arch. Design VIII: Integrative Design Project II</b><br>4 | <b>Utilities V: Health &amp; Safety in Bldg.</b><br>2 | <i>Utilities VI: Utilities for Bldg. Interiors</i><br>3     |    |    |
|             |              |   |                                      |                                                                  |                                                                                  |                                                             | <b>Design with Nature: Tropical Design</b><br>2           | <b>Utilities II: Mech. &amp; Elec. Systems of Bldg.</b><br>3 | <b>Utilities IV: Arch. Acoustics</b><br>3                    |                                                       | <i>Utilities VII: Envr. Lighting</i><br>2                   |    |    |
|             |              |   |                                      |                                                                  |                                                                                  |                                                             |                                                           | <b>Utilities I: Plumbing &amp; Sanitary Services</b><br>3    | <b>Utilities III: Arch. Lighting</b><br>3                    |                                                       |                                                             |    |    |
| SINGAPORE   | NUS          |   | <b>Climate Responsive Arch.</b><br>4 |                                                                  | <b>Strategies for Sustainable Arch.</b><br>4                                     | <b>Design 5</b><br>8                                        | <b>Design 6</b><br>8                                      | <b>Arch. &amp; Tech. Design 1<sup>(B)</sup></b><br>8         | <b>Arch. &amp; Tech. Design 2<sup>(B)</sup></b><br>8         | <i>Technical Dissertation<sup>(B)</sup></i><br>8      | <b>Final Design Project<sup>(B)</sup></b><br>20             |    |    |
|             |              |   |                                      |                                                                  |                                                                                  |                                                             |                                                           | <b>Envr. Systems &amp; Cons.</b><br>4                        | <b>Adv. Arch. Tech.<sup>(B)</sup></b><br>4                   | <b>Tech. Module 1<sup>(B)</sup></b><br>4              | <b>Renewable Energy and Architecture<sup>(B)</sup></b><br>4 |    |    |
|             |              |   |                                      |                                                                  |                                                                                  |                                                             |                                                           |                                                              | <b>Tech. Module 1<sup>(B)</sup></b><br>4                     |                                                       | <b>Special Topics in Technology<sup>(B)</sup></b><br>4      |    |    |

\* Required Course

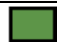

Design Studio

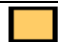

Technology

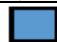

Theory

\* Optional Course

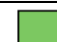

Design Studio

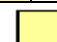

Technology

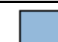

Theory



Table S1. Cont.

|          | YEAR<br>SEM. | I |                          | II                             |                                 | III                                      |                                          | IV                                  |                               | V                            |                           | VI |    |
|----------|--------------|---|--------------------------|--------------------------------|---------------------------------|------------------------------------------|------------------------------------------|-------------------------------------|-------------------------------|------------------------------|---------------------------|----|----|
|          |              | 1 | 2                        | 3                              | 4                               | 5                                        | 6                                        | 7                                   | 8                             | 9                            | 10                        | 11 | 12 |
| TAIWAN   | NCKU         |   |                          | Physical Envr. of Arch. I<br>2 | Physical Envr. of Arch. II<br>2 | Physical Envr. of Arch. III<br>2         | Arch. Planning (Envr.& Integration)<br>2 |                                     | Arch. Design Integration<br>2 | Arch. Design 8<br>6          | Arch. Design 9<br>6       |    |    |
|          |              |   |                          |                                |                                 | Systems of Envr. Control I<br>2          | Planning of Green Bldg.<br>2             |                                     | Bldg. Systems Design<br>2     |                              |                           |    |    |
|          |              |   |                          |                                |                                 | Bldg. Cons. II (LCA)<br>3                |                                          |                                     |                               |                              |                           |    |    |
| THAILAND | CU           |   | Arch. Design 1<br>4      | Arch. Design 2<br>4            | Arch. Design 3<br>4             | Arch. Design 4<br>4                      | Arch. Design 5<br>4                      | Arch. Design 6<br>4                 | Arch. Design 7<br>4           | Arch. Design 8<br>4          |                           |    |    |
|          |              |   |                          |                                | Bldg. Tech. and Cons.1<br>4     | Daylighting in Arch. Design<br>2         | Bldg. Tech. and Cons. 2<br>4             | Pollution Problems and Control<br>2 | Bldg. Tech. and Cons. 3<br>4  | Bldg. Tech. and Cons. 4<br>4 |                           |    |    |
|          |              |   | Thai Arch. Heritage<br>3 | Intro. to Thai Arch.<br>3      |                                 | Intro.to Urban & Arch. Conservation<br>2 |                                          |                                     |                               |                              | Arch. Design Seminar<br>3 |    |    |

\* Required Course      Design Studio      Techonology      Theory    \* Optional Course      Design Studio      Techonology      Theory

- Notes: (1) Optional courses can be taken in any semester.  
 (2) Optional courses can be taken in any semester from 9 to 12.  
 (3) *Vastushastra* is similar to feng shui which teaches sustainable design practices and arrangement based on the traditional Indian techniques.  
 (4) Students must take 70% of basic major courses, among them the sustainability courses in this table. For the present study, we used a rough approximation by applying a coefficient of 0.7 to the number of credits.  
 (5) All the courses of U-Tokyo in this table belong to the category of “limited elective”, which are about 65% of the whole curriculum (minimum 55 credits out of the total 84). These 55 credits are elected from a total choice of 68. For the present study, we used a rough approximation by applying a coefficient of  $55/68 \approx 0.8$  to the number of credits.  
 (6) Full name: *Exercises in Mechanical Equipment & Environmental Engineering in Building*  
 (7) Optional courses can be taken in any semester from fifth to tenth. (8) Required courses for B.A. (Arch) (DTS) curriculum: Specialization in Design Technology and Sustainability.

## Abbreviations

|          |                               |
|----------|-------------------------------|
| Arch.    | Architecture or Architectural |
| Bldg.    | Building                      |
| Cons.    | Construction                  |
| Elec.    | Electrical                    |
| Engg.    | Engineering                   |
| Envr.    | Environment or Environmental  |
| Intro.   | Introduction                  |
| Managmt. | Management                    |
| Mat.     | Material                      |
| Mech.    | Mechanical                    |
| Struc.   | Structure                     |
| Sim.     | Simulation                    |
| Tech.    | Technology                    |
